# Supplementary material for: Construction of the Sn-doped defect pyrochlore oxide KNbMoO6·H2O/g-C3N4 composite and its photocatalytic reduction of CO2
Source: Royal Society of Chemistry journal article supplement (doi:10.1039/d2nj03415h), 2022-01-01
Supplement: d2nj03415h1.pdf [file d2nj03415h1.pdf]

## Construction of Sn-doped defects pyrochlore oxide $\text{KNbMoO}_6 \cdot \text{H}_2\text{O}/\text{g-C}_3\text{N}_4$ composite and its photocatalytic reduction of $\text{CO}_2$

Xu Zeng,<sup>ab</sup> Bo Wang,<sup>b</sup> Xin Zhang,<sup>b</sup> Hong Zhang,<sup>b</sup> Meiqing Fan,<sup>c</sup> Jun Wang,<sup>d</sup> Bo Ren<sup>\*b</sup>, Xiaodong Yang<sup>\*b</sup> and Xuefeng Bai<sup>\*a</sup>

<sup>a</sup> Institute of Petrochemistry Heilong Jiang Academy of Sciences, Harbin 150001, People's Republic of China, E-mail: tommybai@126.com

<sup>b</sup> Institute for Interdisciplinary Biomass Functional Materials Studies, Jilin Engineering Normal University, Changchun 130052, People's Republic of China

<sup>c</sup> Measurement Biotechnology Research Center, College of Food Engineering, Jilin Engineering Normal University, Changchun, 130052, People's Republic of China

<sup>d</sup> Key Laboratory of Superlight Materials and Surface Technology, Ministry of Education, College of Materials Science and Chemical Engineering, Harbin Engineering University, Harbin 150001, People's Republic of China

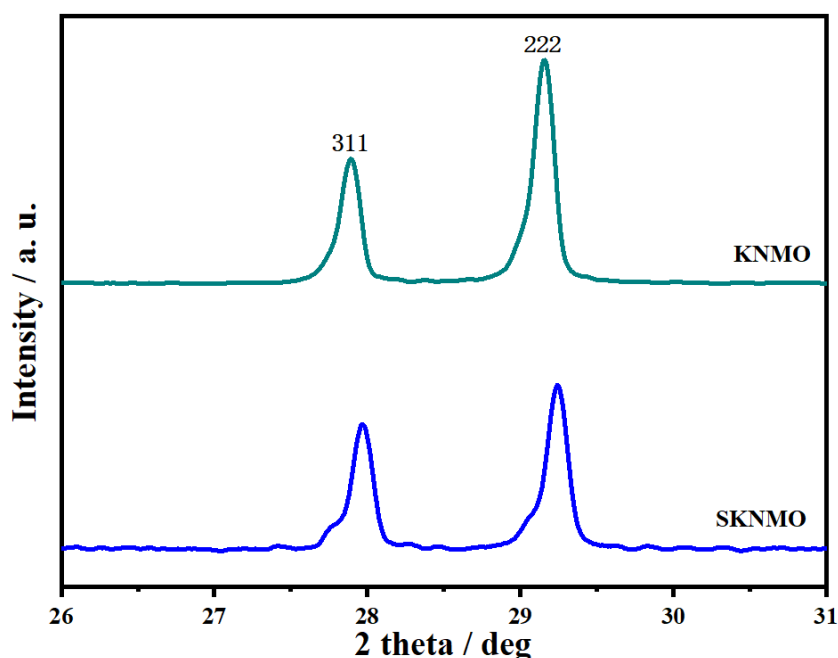

Fig. S1 Partial enlarged graph of XRD patterns shows the shift of (311) and (222) reflection peak position.
